# Supplementary material
Source: PubMed Central journal article supplement (PMC4458190)
Supplement: NIHMS657694-supplement-01.pdf [file NIHMS657694-supplement-01.pdf]

## Supplemental Tables

|                                            | <i>t</i> | <i>p</i> |
|--------------------------------------------|----------|----------|
| L Postcentral                              | 4.11     | <.0001   |
| L Inferior Temporal                        | 4.26     | <.0001   |
| L Lateral Occipital                        | 4.12     | <.0001   |
| R Middle Temporal                          | 3.68     | .001     |
| R Rostral Middle Frontal                   | 1.38     | .18      |
| R Inferior Frontal <i>pars opercularis</i> | 2.89     | .006     |

**Table S1.** Cortical thickness is related to a continuous measure of family income ( $n = 46$ ). Thickness values were extracted from the clusters defined from the whole brain analysis comparing income groups. All regressions control for sex.

|                                            | Income group<br>( <i>t</i> ) | Income group<br>( <i>p</i> ) | Ethnicity<br>( <i>t</i> ) | Ethnicity<br>( <i>p</i> ) |
|--------------------------------------------|------------------------------|------------------------------|---------------------------|---------------------------|
| L Postcentral                              | 3.35                         | .002                         | -.19                      | .85                       |
| L Inferior Temporal                        | 4.68                         | <.0001                       | .91                       | .37                       |
| L Lateral Occipital                        | 3.79                         | <.0001                       | .67                       | .51                       |
| R Middle Temporal                          | 4.33                         | <.0001                       | .51                       | .61                       |
| R Rostral Middle Frontal                   | 3.28                         | .002                         | .19                       | .85                       |
| R Inferior Frontal <i>pars opercularis</i> | 3.99                         | <.0001                       | .35                       | .73                       |

**Table S2.** Cortical thickness and income group, controlling for ethnicity ( $n = 56$ ). Ethnicity was coded as Hispanic or Latino (1)/Not Hispanic or Latino (0). All regressions control for sex.

|                                            | Income group<br>( <i>t</i> ) | Income group<br>( <i>p</i> ) | Race ( <i>t</i> ) | Race ( <i>p</i> ) |
|--------------------------------------------|------------------------------|------------------------------|-------------------|-------------------|
| L Postcentral                              | 3.22                         | .002                         | 1.70              | .10               |
| L Inferior Temporal                        | 4.43                         | <.0001                       | 1.24              | .22               |
| L Lateral Occipital                        | 3.70                         | .001                         | .98               | .33               |
| R Middle Temporal                          | 4.10                         | <.0001                       | 1.68              | .10               |
| R Rostral Middle Frontal                   | 4.20                         | <.0001                       | 1.27              | .21               |
| R Inferior Frontal <i>pars opercularis</i> | 4.88                         | <.0001                       | .24               | .81               |

**Table S3.** Cortical thickness and income group, controlling for race ( $n = 48$ ). Race was coded as White (1)/Non-white (0). All regressions control for sex.

|                     | Test score<br>( $t$ ) | Test score<br>( $p$ ) | Income group<br>( $t$ ) | Income group<br>( $p$ ) | Test score<br>( $t$ ) | Test score<br>( $p$ ) | Cont. income<br>( $t$ ) | Cont. income<br>( $p$ ) |
|---------------------|-----------------------|-----------------------|-------------------------|-------------------------|-----------------------|-----------------------|-------------------------|-------------------------|
| L Middle Temporal   | 2.83                  | .007                  | 1.84                    | .07                     | 4.17                  | <.001                 | 2.22                    | .03                     |
| L Lateral Occipital | 3.13                  | .003                  | 2.79                    | .007                    | 4.81                  | <.001                 | 2.29                    | .03                     |
| R Cuneus            | 3.27                  | .002                  | 2.28                    | .03                     | 4.85                  | <.001                 | .66                     | .51                     |
| R Superior Temporal | 2.42                  | .02                   | 2.64                    | .01                     | 4.28                  | <.001                 | 1.98                    | .05                     |
| R Supramarginal     | 1.99                  | .05                   | 3.13                    | .003                    | 3.16                  | .003                  | 1.53                    | .13                     |

**Table S4.** Cortical thickness and standardized test scores, controlling for income group ( $n = 58$ ) or a continuous measure of family income ( $n = 46$ ). All regressions control for sex.

## Supplemental Figures

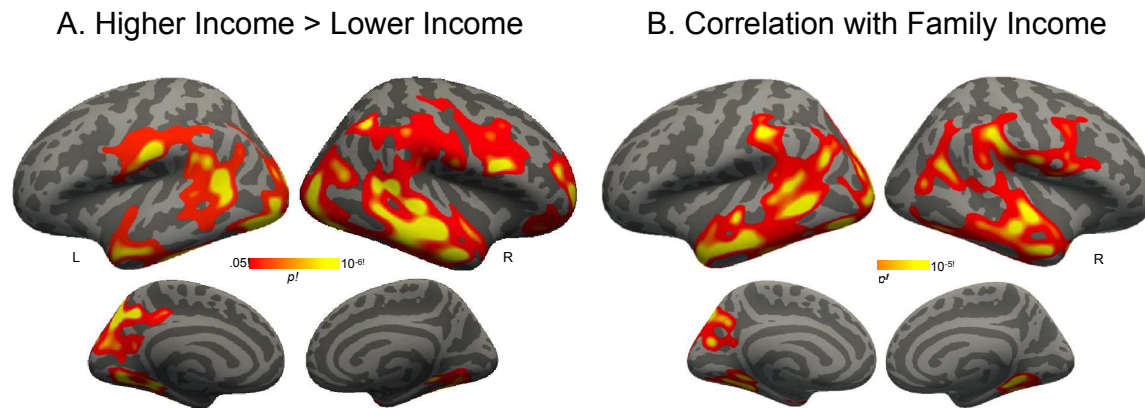

**Figure S1.** Whole-brain analyses of cortical thickness and two measures of income. A. Results presented in the manuscript: Higher Income group > Lower Income group ( $n = 58$ ). B. Correlation with family income ( $n = 46$ ). All analyses control for sex. Results are cluster-corrected with a cluster-forming threshold of  $p < .05$  and a clusterwise significance of  $p < .05$ , adjusted for 2 hemispheres.
